# Supplementary material for: Structure–Activity Relationship and Molecular Docking of a Kunitz-Like Trypsin Inhibitor, Kunitzin-AH, from the Skin Secretion of Amolops hainanensis
Source: MDPI journal article supplement (doi:10.3390/pharmaceutics13070966), 2021-06-26
Supplement: s1 [file s1]

# Supplementary Materials: Structure–Activity Relationship and Molecular Docking of a Kunitz-Like Trypsin Inhibitor, Kunitzin-AH, from the Skin Secretion of *Amolops hainanensis*

Yuqing Chen, Xinping Xi, Chengbang Ma, Mei Zhou, Xiaoling Chen, Zhuming Ye, Lilin Ge, Qinan Wu, Tianbao Chen, Lei Wang and Hang Fai Kwok

```

      M F T L K K S L L L L F F L G M I
1  ATGTTACCT TGAAGAAATC CTTGTTACTC CTTTCTTTTC TCGGGATGAT
   TACAAGTGGA ACTTCTTTAG GAACAATGAG GAAAAGAAAG AGCCCTACTA
      S L S L C E Q E R D A N E E R R D
51 CTCTTATCT CTCTGTGAGC AAGAGAGAGA TGCCAATGAA GAAAGAAGAG
   GAGGAATAGA GAGACACTCG TTCTCTCTCT ACGGTACTTT CTTTCTTCTC
      D A D E S E A N G G E V K V E D
101 ATGATGCAGA TGAAAGTGAA GCAAATGGAG GGAAGTTAA AGTGGAAGAC
   TACTACGTCT ACTTTCACCTT CGTTTACCTC CCCTTCAATT TCACCTTCTG
      I K R A V R P P F R C K A A F C *
151 ATAAAAAGAG CTGTTAGACC TCCTTTTAGG TGTAAGCCG CGTTCTGTTA
   TATTTTCTC GACAATCTGG AGGAAATCC ACATTTCGGC GCAAGACAAT

201 AAAGTTGAAT TGGAAGTTAA TTCTGAAATA TCTAACCAA ATAAAAATGT
   TTTCAACTTA ACCTTCAATT AAGACTTTAT AGATTGGTTT TATTTTITACA
251 TACATACACT GCAAAAAAAA AAAAAA AAAA
   ATGTATGTGA CGTTTTTTTT TTTTTTTTTT TTTTTTTT
  
```

**Figure S1.** Nucleotide and translated open-reading frame amino acid sequence of cloned cDNAs encoding a novel peptide precursor Kunitzin-AH from *Amolops hainanensis*. Putative signal peptides are marked with double-underline, mature peptides are marked with single-peptides and stop codons are indicated with asterisks.

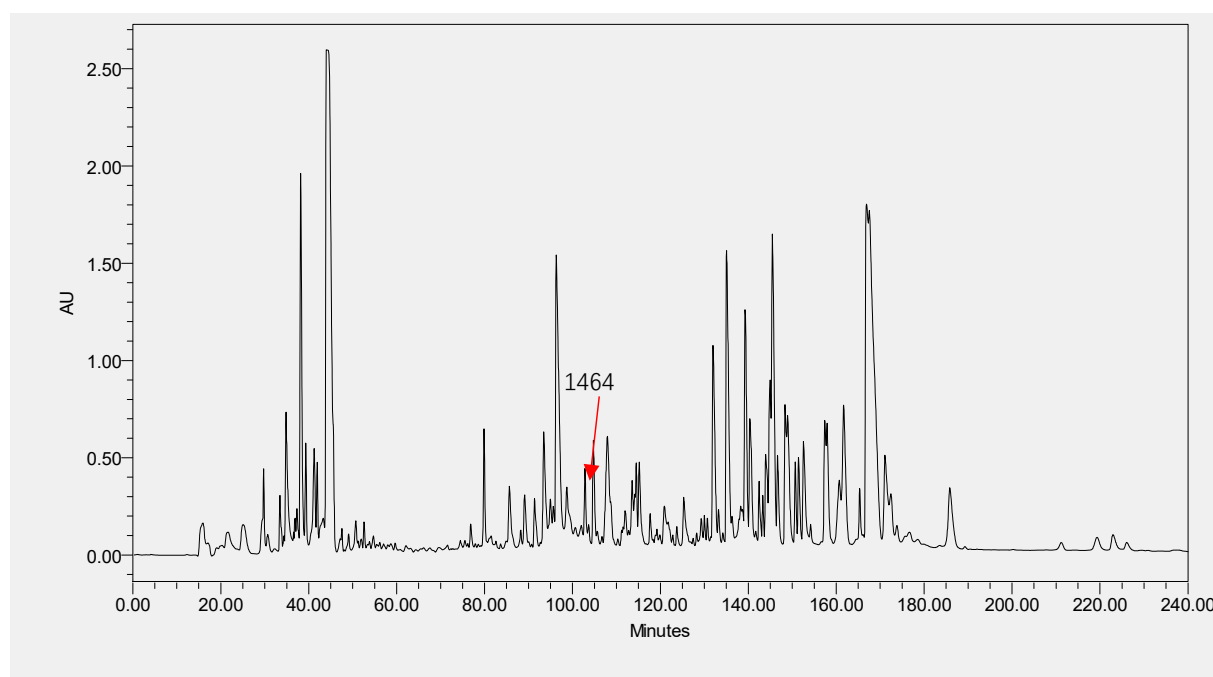

(a)

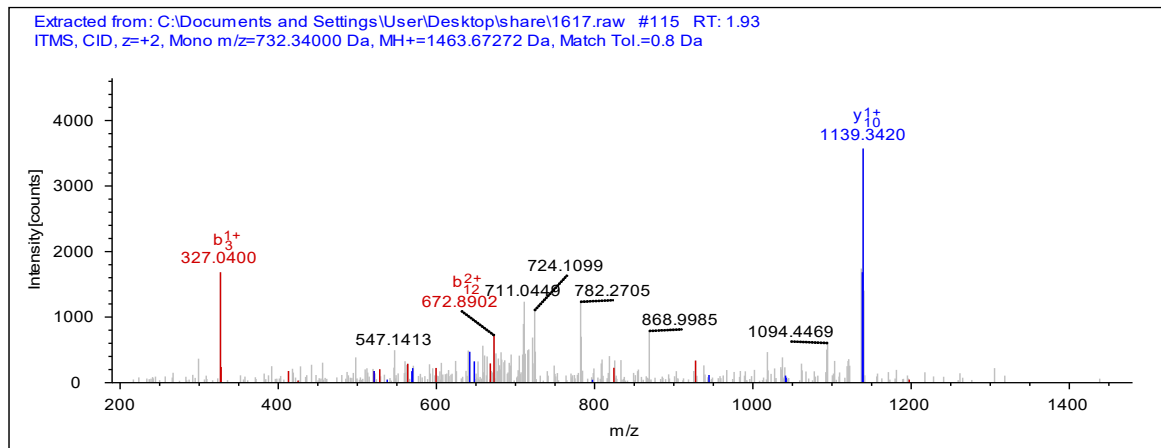

(b)

| #1 | b(1+)      | b(2+)     | Seq. | y(1+)      | y(2+)     | #2 |
|----|------------|-----------|------|------------|-----------|----|
| 1  | 72.04440   | 36.52584  | A    |            |           | 13 |
| 2  | 171.11282  | 86.06005  | V    | 1393.73446 | 697.37087 | 12 |
| 3  | 327.21394  | 164.11061 | R    | 1294.66604 | 647.83666 | 11 |
| 4  | 424.26671  | 212.63699 | P    | 1138.56492 | 569.78610 | 10 |
| 5  | 521.31948  | 261.16338 | P    | 1041.51215 | 521.25971 | 9  |
| 6  | 668.38790  | 334.69759 | F    | 944.45938  | 472.73333 | 8  |
| 7  | 824.48902  | 412.74815 | R    | 797.39096  | 399.19912 | 7  |
| 8  | 927.49821  | 464.25274 | C    | 641.28984  | 321.14856 | 6  |
| 9  | 1055.59318 | 528.30023 | K    | 538.28065  | 269.64396 | 5  |
| 10 | 1126.63030 | 563.81879 | A    | 410.18568  | 205.59648 | 4  |
| 11 | 1197.66742 | 599.33735 | A    | 339.14856  | 170.07792 | 3  |
| 12 | 1344.73584 | 672.87156 | F    | 268.11144  | 134.55936 | 2  |
| 13 |            |           | C    | 121.04302  | 61.02515  | 1  |

(c)

**Figure S2.** Identification of the specific trypsin inhibitor Kunitz-AH derived from the skin secretion of *Amolops hainanensis*. (a) RP-HPLC chromatogram of skin secretion of *A. hainanensis* monitored at 214 nm. The red arrow indicates the retention time of Kunitz-AH. (b) Annotated MS/MS spectrum of Kunitz-AH. (c) Predicted b- and y-ions arising from collision induced dissociation of the double-charged (732.34 m/z, [M+2H]<sup>2+</sup>) precursor ion. The observed b- and y-ions are indicated in blue and red typefaces.

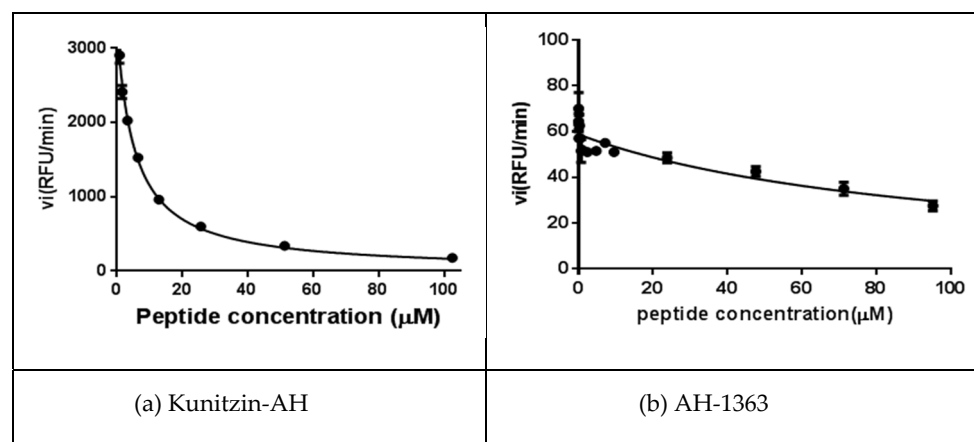

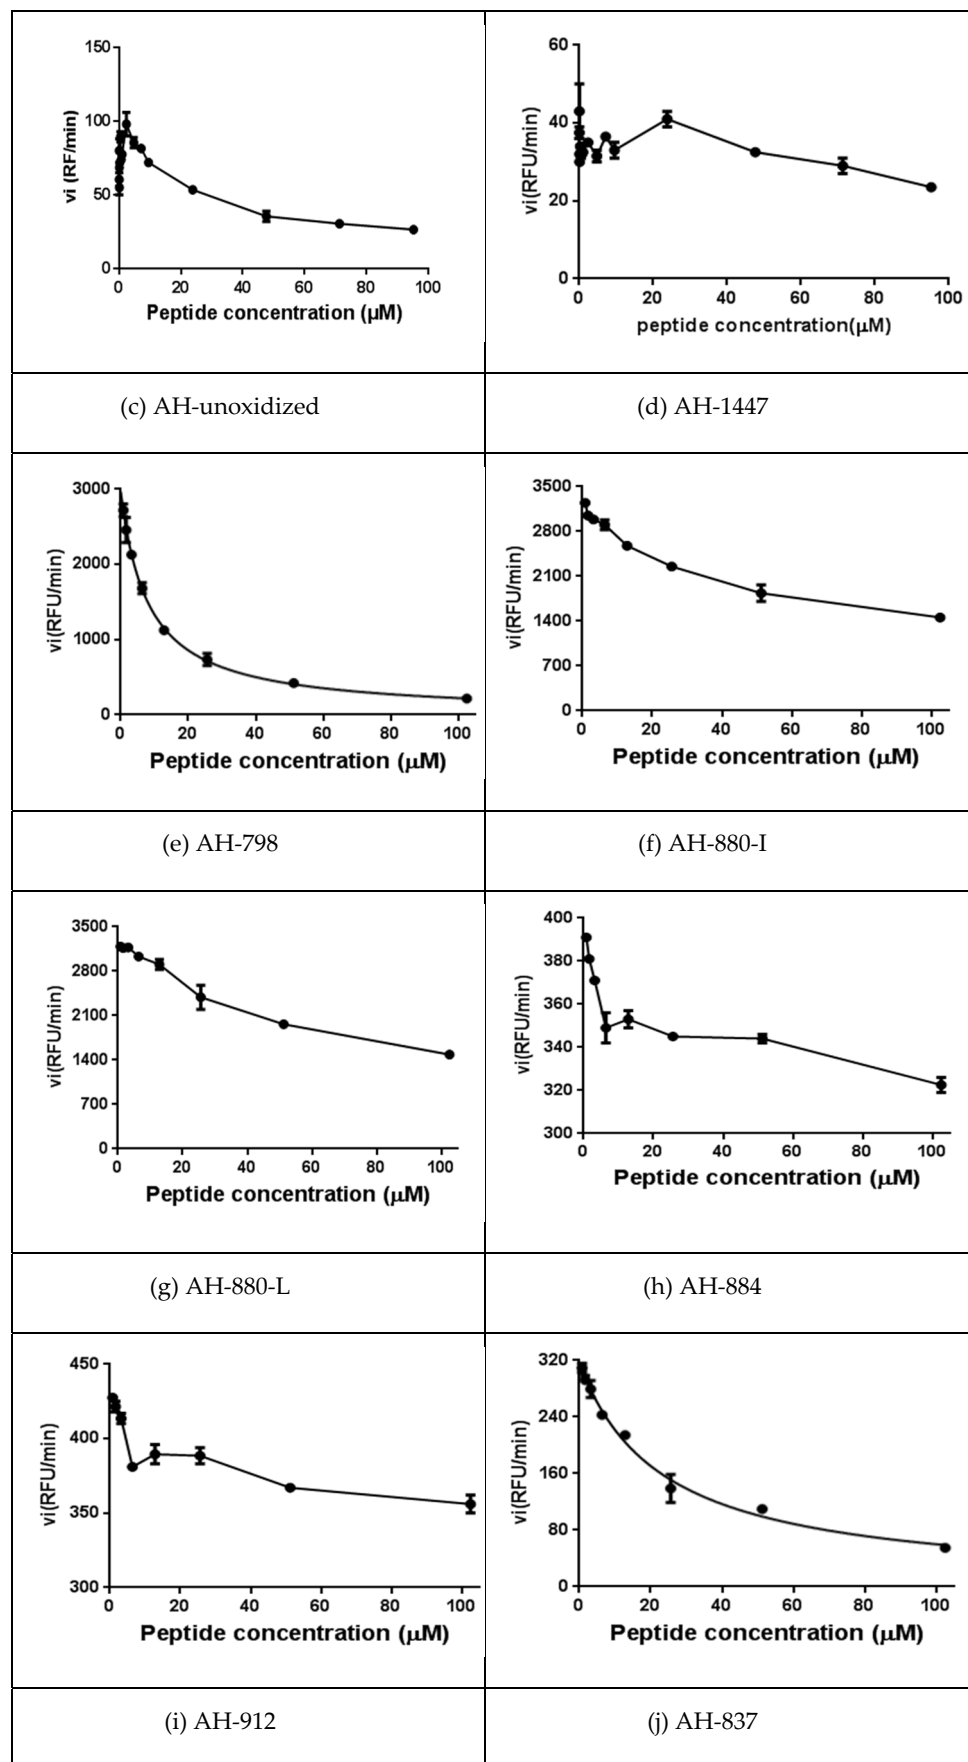

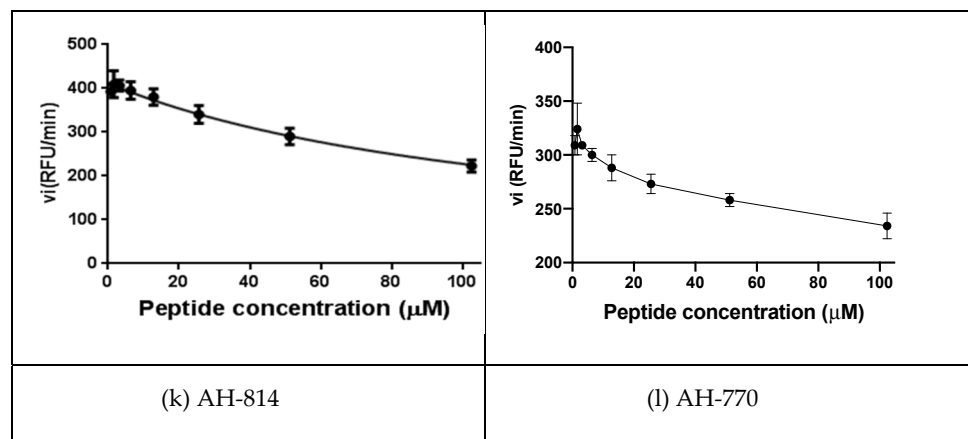

**Figure S3.** The progress curve of inhibition rate in the presence of different concentrations of peptides (a) Kunitzin-AH; (b) AH-1363; (c) AH-unoxidized; (d) AH-1447; (e) AH-798; (f) AH-880-I; (g) AH-880-L; (h) AH-884; (i) AH-912; (j) AH-837; (k) AH-814 and (l) AH-770 ranging from 0.8  $\mu\text{M}$  to 102.4  $\mu\text{M}$ . The Y-axis represented the rate of the fluorescence decay, while the X-axis represented peptide concentrations in  $\mu\text{M}$ . The  $K_i$  values were calculated by Morrison formula in Prism 6, in which  $K_m = 11.70 \mu\text{M}$ ,  $[S] = 42.86 \mu\text{M}$ ,  $E_t = 0.0002 \mu\text{M}$ . Error bars represent standard error of mean (SEM) of three replicates.

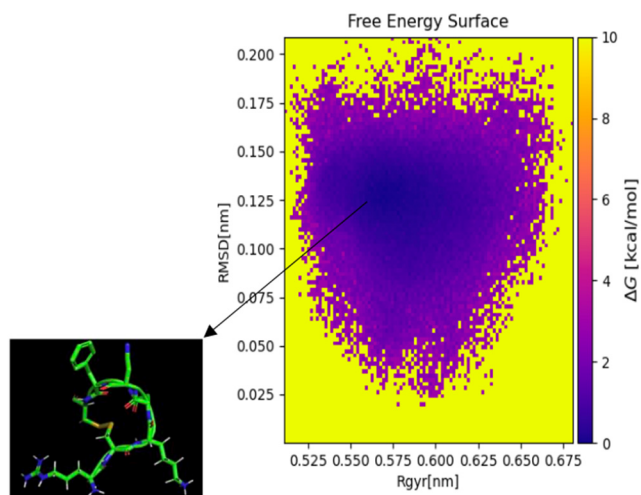

(a)

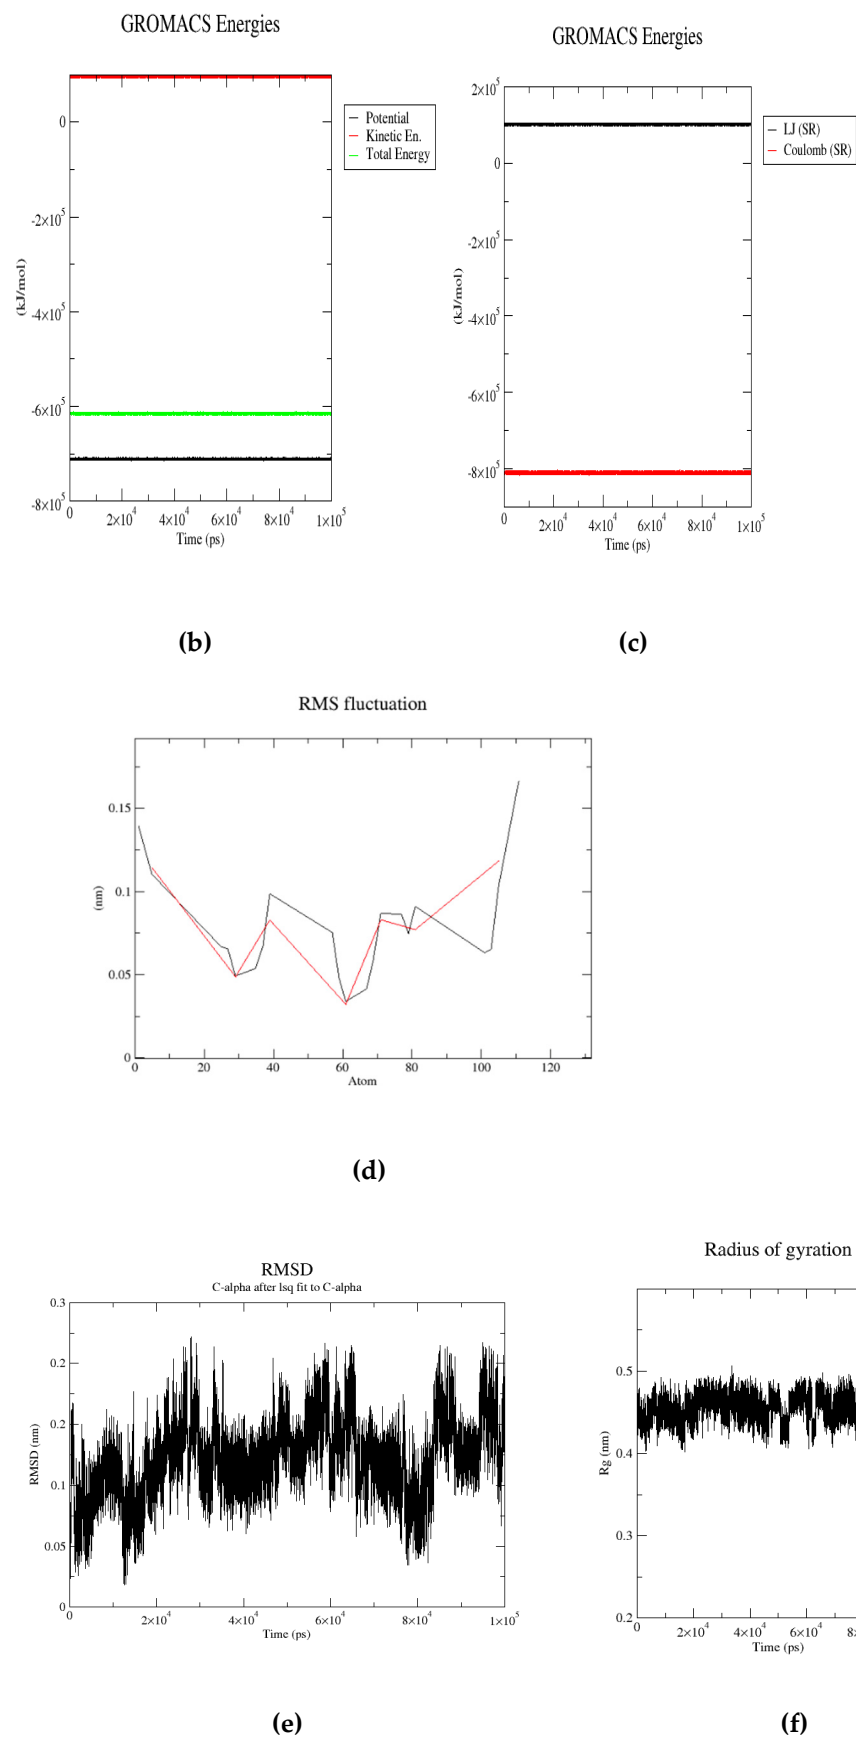

**Figure S4. (a)** Free energy surfaces (in kcal/mol) for the aggregation of AH-837 forming a disulphide bridge in terms of the radius of gyration ( $R_{gyr}$ ) and the root mean square deviation (RMSD). The darker region represented the lower energy of the structure, and the conformation with the lowest energy was indicated with an arrow. **(b)** Potential energy (black), kinetic energy

(red) and total energy (green) fluctuation of the system during the production molecular dynamics simulation within 100 ns; **(c)** Lennard-Jones Short Range potential (black) and Coulomb short-range force (red) fluctuation of the system during the production molecular dynamics simulation within 100 ns. **(d)** Root mean square fluctuation (RMSF) of the C $\alpha$  in the structure of AH-837 (indicated with black lines) and the carbon backbone of the structure (indicated with red lines). **(e)** The root mean square deviation (RMSD) values of the C $\alpha$  in the structure of AH-837 during the production molecular dynamics simulation within 100 ns; **(f)** Radius of gyration (Rg) of the whole conformation during the production molecular dynamics simulation within 100 ns.

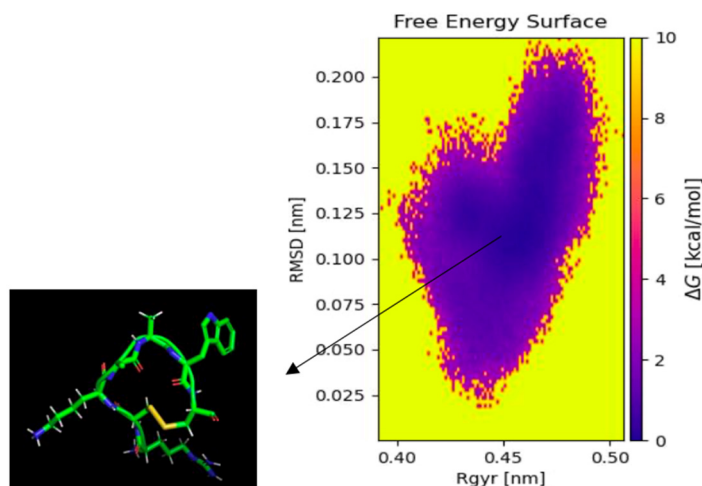

**(a)**

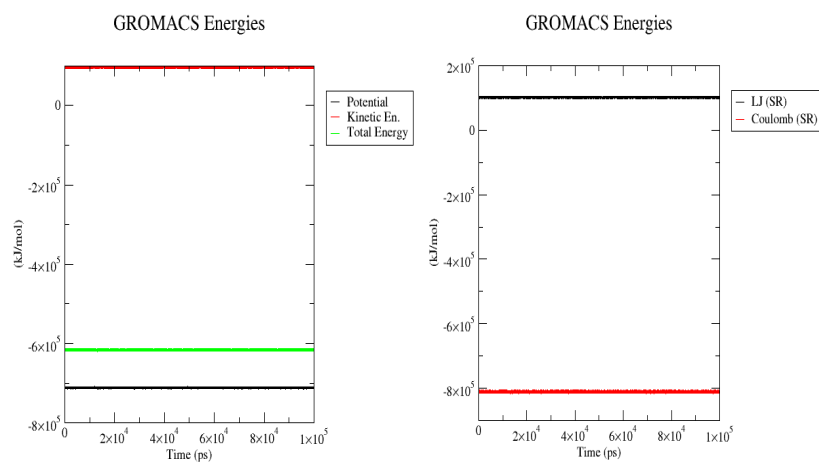

**(b)**

**(c)**

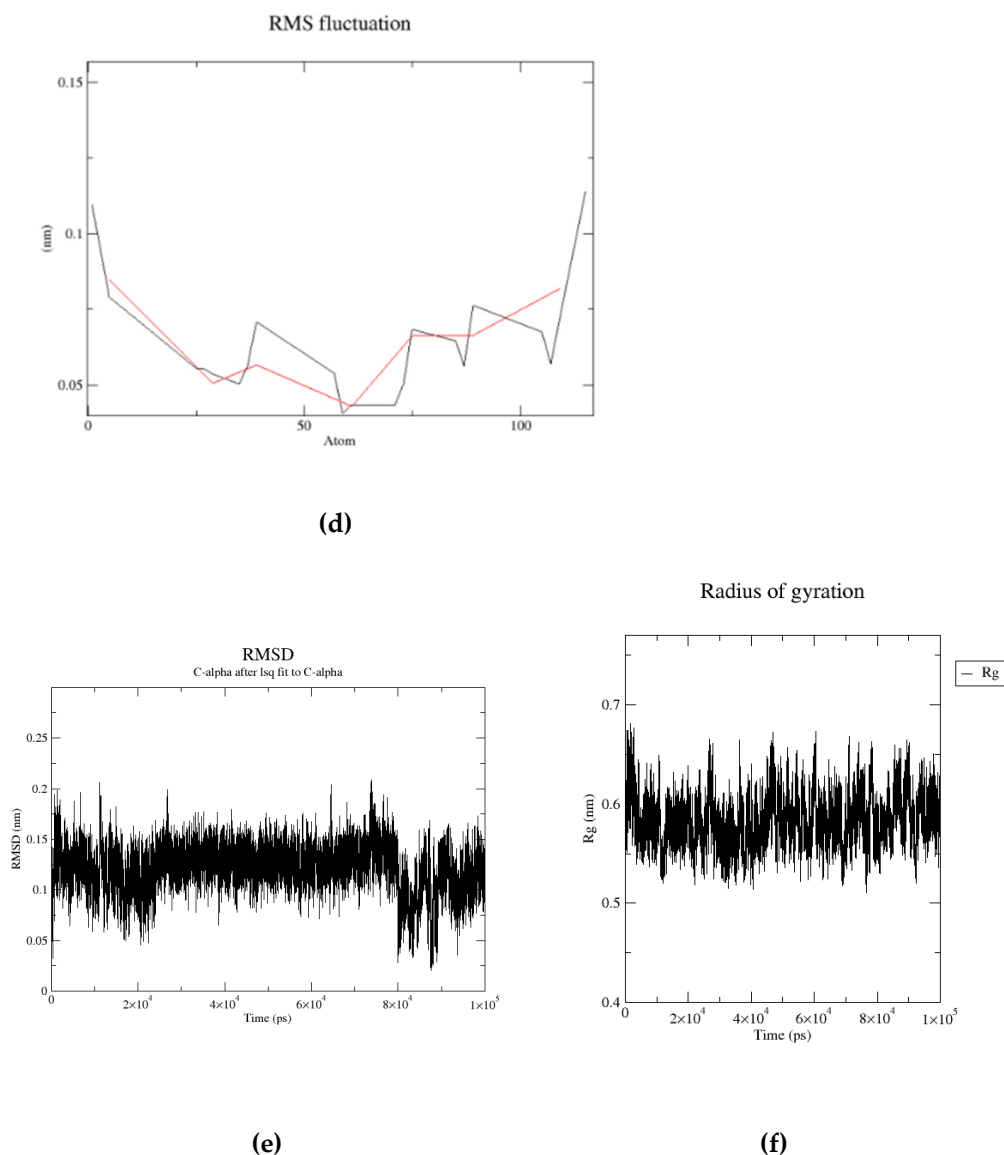

**Figure S5.** (a) Free energy surfaces (in kcal/mol) for the aggregation of AH-884 forming a disulphide bridge in terms of the radius of gyration ( $R_{gyr}$ ) and the root mean square deviation (RMSD). The darker region represented the lower energy of the structure, and the conformation with the lowest energy was indicated with an arrow. (b) Potential energy (black), kinetic energy (red) and total energy (green) fluctuation of the system during the production molecular dynamics simulation within 100 ns; (c) Lennard-Jones Short Range potential (black) and Coulomb short-range force (red) fluctuation of the system during the production molecular dynamics simulation within 100 ns. (d) Root mean square fluctuation (RMSF) of the C $\alpha$  in the structure of AH-884 (indicated with black lines) and the carbon backbone of the structure (indicated with red lines). (e) The root mean square deviation (RMSD) values of the C $\alpha$  in the structure of AH-884 during the production molecular dynamics simulation within 100 ns; (f) Radius of gyration ( $R_g$ ) of the whole conformation during the production molecular dynamics simulation within 100 ns.
